# Supplementary material
Source: publisher figshare collection journal article supplement (https://sage.figshare.com/ndownloader/files/17509469)

**Appendix 5:** Funnel plot of the included studies for the systematic review of mood and anxiety disorders among migrant groups in Canada. The 95% and 99.8% confidence bounds are pseudo estimates based on studies with no heterogeneity. We scaled the sample sizes by a factor of 100 to create confidence bounds that are wider to increase the interpretability of the asymmetry of the included studies.

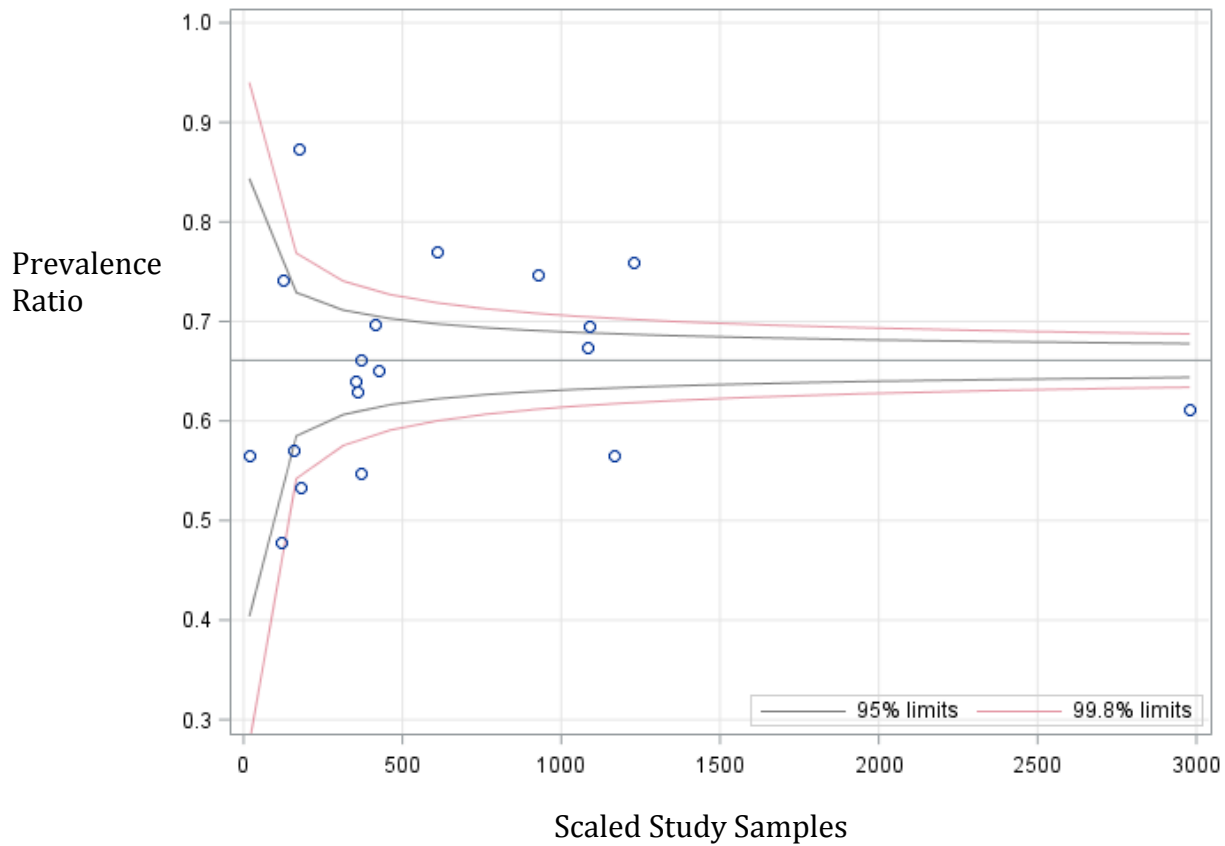

Supplement: Supplementary file 1 [file 17509469]
